# Supplementary material for: Wellness and Coping of Physicians Who Worked in ICUs During the Pandemic: A Multicenter Cross-Sectional North American Survey*
Source: PubMed Central journal article supplement — Crit Care Med. 2022 Oct 27;50(12):1689–700. doi: 10.1097/CCM.0000000000005674 (PMC9668381; doi:10.1097/ccm.0000000000005674), 2022-10-27
Supplement: ccm-50-1689-s005.pdf [file ccm-50-1689-s005.pdf]

**Figure 5A: COVID-19 Patient Volume and Average MMD-HP Scale Scores**

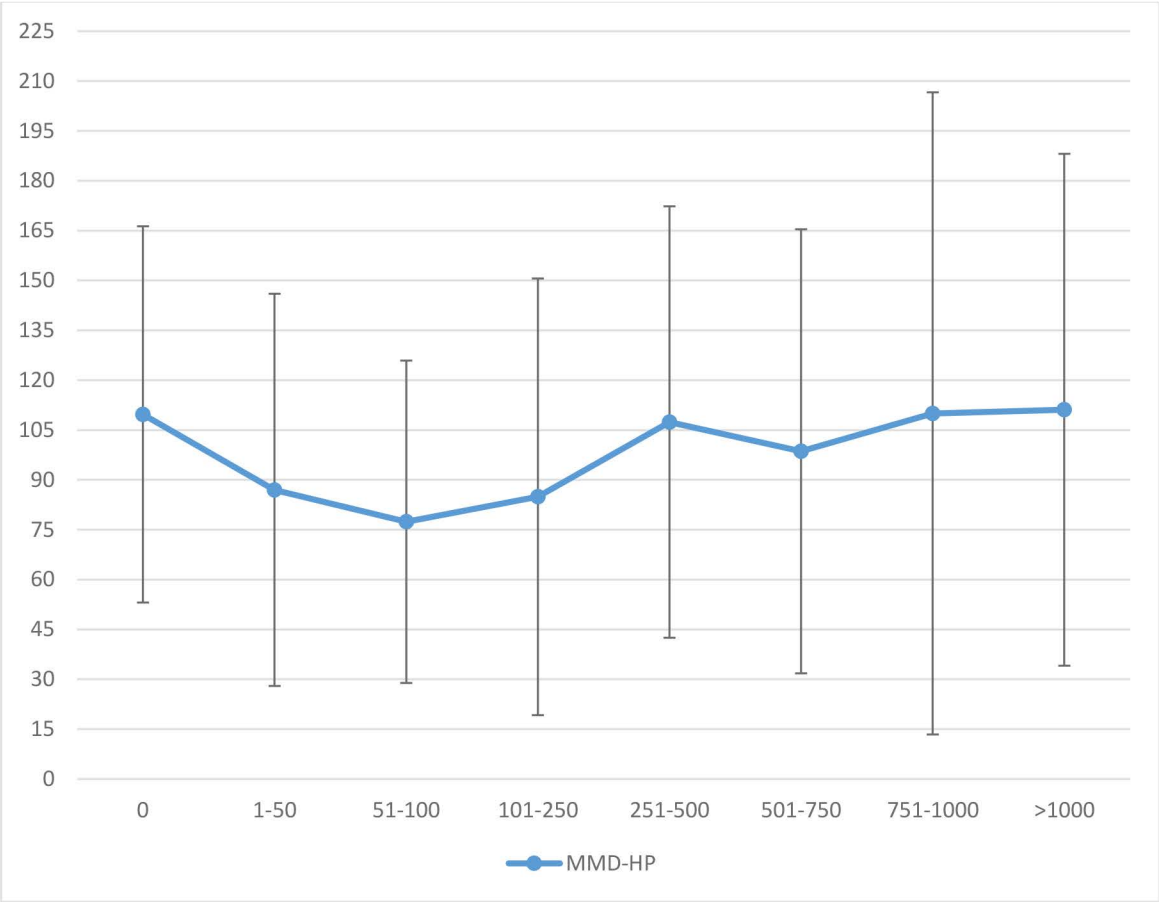

MMD-HP = Measure of Moral Distress for Healthcare Professionals.

Figure 5A depicts physician’s self-reported COVID-19 patient volume (ordered categories) and average Measure of Moral Distress for Healthcare Professionals scores with 95% confidence intervals.

**Figure 5B: COVID-19 Patient Volume and Average Burnout and Professional Fulfillment Subscale Scores**

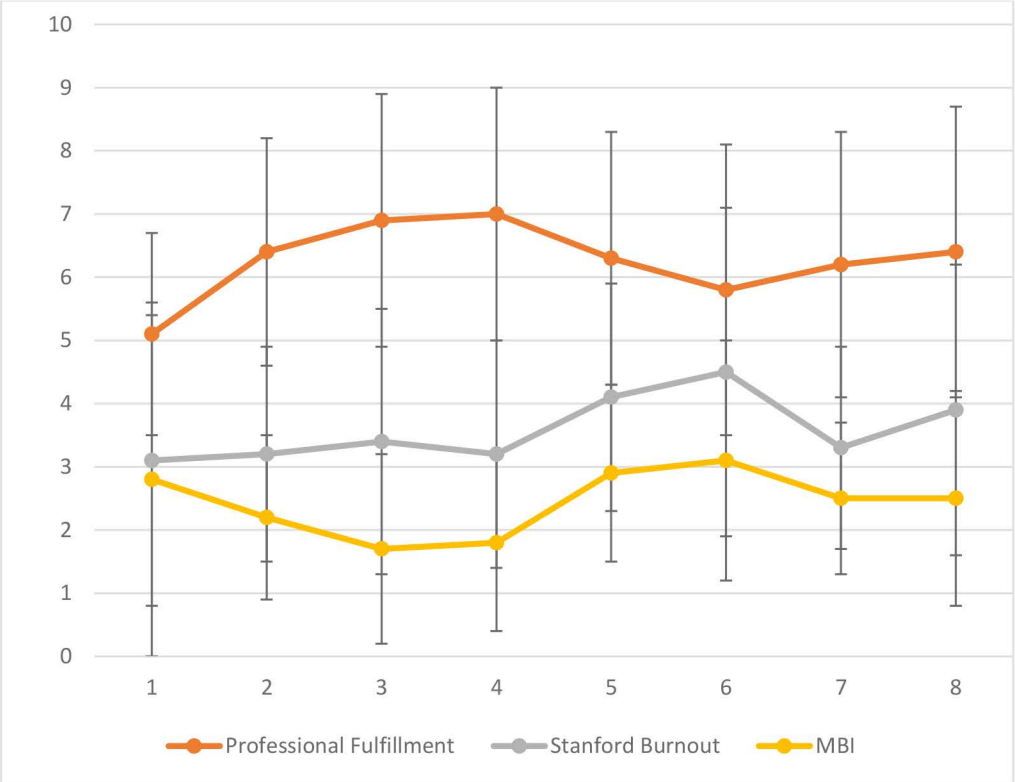

MBI = Maslach Burnout Inventory

Figure 5B depicts physician's self-reported COVID-19 patient volume (ordered categories) and average Maslach Burnout Inventory and Stanford Burnout and Professional Fulfillment subscale scores with 95% confidence intervals.
